# Supplementary material for: Dynamic Pricing in a Distribution Channel in the Presence of Switching Costs
Source: Atypon-hosted journal article supplement (doi:10.1287/mnsc.2016.2649), 2016-12-08
Supplement: mnsc.2016.2649-sm.pdf [file mnsc.2016.2649-sm.pdf]

## Online Appendices

### Appendix 1: Forward Simulation

The objective of this simulation exercise is to calculate the continuation values  $EV_R(Z)$ , and  $EV_j(Z)$ ,  $j=1,2,\dots,J$  in the Bellman equations of the retailer and each manufacturer for a given cost structure  $(\alpha_{0j}, \alpha, \sigma_j)$ , and policy function parameters  $(\theta_j^R, \theta_j^M)$  in the numerical search routine. We simulate numerous paths. For each simulated path, we first choose  $Z_0$  from the state space. We then run the following simulation routine:

1. Given  $Z_0$  and the assumed parametric policy functions calculate retail and wholesale policies  $P_0(Z_0)$  and  $W_0(Z_0)$ . Then, calculate demand by using the predictive aggregate brand market share function  $MS_0(Z_0, P_0)$ .
2. Given  $P_0$ ,  $W_0$  and  $MS_0$ , calculate  $\pi_0^R = \sum_j (P_{0j} - W_{0j})MS_{0j}$  and  $\pi_0^j = (W_{0j} - C_j - v_{0j})MS_{0j}$ ,  $j=1,2,\dots,J$ . Then calculate installed customer base in the next period  $S_1(Z_0, P_0)$ .
3. Given  $S_1$ , draw the rest of the observed and unobserved states from their empirical distributions, and label the full set of states as  $Z_1$ . Given  $Z_1$  repeat steps 1,2.
4. Repeat step 3 for  $T$  times until that  $\rho^T \approx 0$ .

Taking discounted sum of profits calculated for each of the  $T$  periods, and averaging over all simulation paths gives us the set of approximated values for each channel member  $V_R(Z_0)$ , and  $V_j(Z_0)$ ,  $j=1,2,\dots,J$ . We then regress these values on the initial state space  $Z_0$  to get approximated value functions for any arbitrary state combination.

## Appendix 2: Bootstrapping Procedure

We use the following bootstrapping procedure to calculate the standard errors of our supply side estimates:

1. We draw  $\theta^{Ds}$ ,  $s = 1, 2, \dots, ns$ , from the asymptotic normal distribution of the demand model parameter estimates,  $N(\hat{\Theta}^D, \hat{\Sigma}^D)$ , where  $\hat{\Theta}^D$  stands for the estimated demand parameters, and  $\hat{\Sigma}^D$  stands for the estimated covariance matrix of the estimated demand parameters (which accounts for the estimation error in the predictive aggregate market share function).
2. We obtain bootstrapped retail prices and installed customer bases,  $(P_t^s, S_t^s, s = 1, 2, \dots, ns)$ , by drawing independent, random samples, with replacement, from the original data.
3. We re-estimate the cost parameters of the structural econometric model of dynamic channel pricing for each bootstrapped draw of the original data (from Step 2 above), while generating the evolution of states,  $S$ , as well as the market share function,  $MS$ , based on each bootstrapped draw of the estimated demand model parameters (from Step 1 above).
4. Using the estimated cost parameters from Step 3 above, across all bootstrapped draws, we calculate the standard errors associated with those estimates.

### Appendix 3: Monte Carlo Simulation to Test Our Proposed Estimation Algorithm

In this simulation exercise, we study the pricing behavior of two competing manufacturers and one common retailer. For demand parameters, we assume similar levels for intrinsic preferences, price sensitivity and switching cost compared to our demand estimates. For supply side parameters, we assume four different sets of manufacturing cost specifications (Scenario 1: symmetric costs, large cost shocks; Scenario 2: small asymmetric costs and medium cost shocks, Scenario 3: small asymmetric costs and small cost shocks; Scenario 4: large asymmetric costs and very large cost shocks). Given the assumed demand parameters, four each cost scenario, we use the NFXP algorithm (in Appendix 3) to calculate the dynamic policy functions of the retailer (under the repeated Stackelberg assumption for the vertical interactions) and duopolist manufacturers (under the repeated Bertrand assumption for the horizontal interactions). Next, we use these optimal policy functions to simulate data sets (one set for each cost scenario) with the size of 100. After that, we use our proposed algorithm to estimate the assumed scenario specific cost parameters back. We repeat this procedure 100 times, and calculate the mean and the standard deviation of the corresponding estimates.

#### MANUFACTURER DUOPOLY WITH RETAILER

|                  | <b>Scenario 1</b> | <b>Scenario 2</b> | <b>Scenario 3</b> | <b>Scenario 4</b> |
|------------------|-------------------|-------------------|-------------------|-------------------|
| $C_{True,Coke}$  | 0.50              | 0.50              | 0.55              | 0.60              |
| $C_{Est,Coke}$   | 0.5001 (0.0062)   | 0.5000 (0.0038)   | 0.5503 (0.0016)   | 0.5999 (0.0098)   |
| $C_{True,Pepsi}$ | 0.50              | 0.55              | 0.50              | 0.40              |
| $C_{Est,Pepsi}$  | 0.4988 (0.0075)   | 0.5496 (0.0037)   | 0.4995 (0.0028)   | 0.3986 (0.0096)   |
| $V_{True,Coke}$  | 0.08              | 0.05              | 0.02              | 0.12              |
| $V_{Est,Coke}$   | 0.0786 (0.0041)   | 0.0493 (0.0021)   | 0.0195 (0.0010)   | 0.1192 (0.0071)   |
| $V_{True,Pepsi}$ | 0.08              | 0.04              | 0.03              | 0.10              |
| $V_{Est,Pepsi}$  | 0.0795 (0.0036)   | 0.0397 (0.0018)   | 0.0298 (0.0009)   | 0.0992 (0.0058)   |

## Appendix 4: Multi-Agent NFXP Algorithms for Counterfactual Studies

### Appendix 4.1: Dynamic Channel Pricing

In this numerical exercise, given the demand and supply parameters, we calculate the optimal dynamic policies of the retailer as well as manufacturers Coke and Pepsi. Each period, the retailer chooses two policies ( $P_j, j=1,2$ ), and each manufacturer chooses one policy, i.e., Coke chooses  $W_1$  and Pepsi chooses  $W_2$  respectively. Here is the algorithm:

1. Start with  $P_1^0, P_2^0, W_1^0, W_2^0$ :
  - 1.1. Given  $W_1^0, W_2^0$ , get the optimal dynamic response of the retailer by running the subroutine in the Appendix 4.1.2.
  - 1.2. In order to get  $\partial P / \partial W_0$ , run the subroutine in the Appendix 4.1.3.
  - 1.3. Given  $\partial P / \partial W_0$ , find  $W_1^1, W_2^1$  as follows
    - 1.3.1. Given  $W_2^0$ , get  $W_1^{0,1}$  by running the subroutine in the Appendix 4.1.5.
    - 1.3.2. Given  $W_1^{0,1}$ , get  $W_2^{0,1}$  by running the subroutine in the Appendix 4.1.7.
    - 1.3.3. Repeat 1.3.1-1.3.2 until  $\|W^{0,n} - W^{0,n-1}\| \approx 0$ .
    - 1.3.4. Set  $W^1 = W^{0,n}$
  - 1.4. Repeat 1.1-1.4 until  $\|W^n - W^{n-1}\| \approx 0, \|P^n - P^{n-1}\| \approx 0$ .
  - 1.5. Set  $W^* = W^n, P^* = P^n$

#### Appendix 4.1.1: Subroutine Retailer Optimality

The objective of this subroutine is to find the best response of the retailer  $P_1^*, P_2^*$  to a given set of actions of Coke and Pepsi,  $W_1, W_2$  under a given expected continuation value in the retailer's Bellman equation  $EV_R(Z)$ . In other words, the objective is given by

$$(P_1, P_2) = \arg \max \{ (P_1 - W_1)MS_1 + (P_2 - W_2)MS_2 + \rho EV_R(Z' | Z, P) \}$$

where  $MS_j$  is the market share for product  $j=1,2$ . In order to find optimal  $P_1^*, P_2^*$

1. Start with  $P_1^0, P_2^0$ . Given  $P_1^0, P_2^0$  calculate the following:

$$\frac{\partial V_R(Z)}{\partial P_1} = MS_1 + (P_1 - W_1)MS_{11} + (P_2 - W_2)MS_{21} + \rho EV_{R1}(Z')$$

$$\frac{\partial V_R(Z)}{\partial P_2} = MS_2 + (P_1 - W_1)MS_{12} + (P_2 - W_2)MS_{22} + \rho EV_{R2}(Z')$$

where  $MS_{jk} = \partial MS_j / \partial P_k, j, k=1,2$ , and  $EV_{Rj} = (\partial EV_R(Z' | Z, P) / \partial Z')(\partial Z' / \partial P_j), j=1,2$

By rearranging, we can get  $P_1^1, P_2^1$  as follows:

$$P_1^1 = W_1 - [MS_1 + (P_2 - W_2)MS_{21} + \rho EV_{R1}(Z' | Z, P)][MS_{11} + MS_{21}]^{-1}$$

$$P_2^1 = W_2 - [MS_2 + (P_1 - W_1)MS_{12} + \rho EV_{R2}(Z' | Z, P)][MS_{12} + MS_{22}]^{-1}$$

2. Given  $P_1^1, P_2^1$ , repeat step 1, to get  $P_1^2, P_2^2$ .
3. Repeat step 2 to update  $P_1, P_2$  until an iteration  $n$  such that  $\|P^n - P^{n-1}\| \approx 0$ .
4. Set  $P_1^* = P_1^n, P_2^* = P_2^n$ .

#### *Appendix 4.1.2: Subroutine Dynamic Retailer Response*

The objective of this subroutine is to find the dynamic best response of the retailer to the actions of Coke and Pepsi,  $W_1, W_2$ . Here is the subroutine:

1. Start with  $EV_R^0(Z) = 0$ : the expected continuation value in the retailer's Bellman equation is zero.
  - a. Get  $P_1^{0*}, P_2^{0*}$  under  $EV_R^0(Z) = 0$  by using the subroutine in the Appendix 4.1.1. Given

$P_1^{0*}, P_2^{0*}$  calculate the following Bellman equation over the state space  $Z$ .

$$V_R^1(Z) = (P_1^{0*} - W_1)MS_1 + (P_2^{0*} - W_2)MS_2 + \rho EV_R(Z' | Z, P^{0*})$$

Then, interpolate  $EV_R^1(Z)$  for any arbitrary  $Z$  by using the calculated  $V_R^1(Z)$  over the chosen state space  $Z$ .

- b. Given  $EV_R^1(Z)$ , get  $P_1^{1*}, P_2^{1*}$  by using the subroutine in the Appendix 4.1.1. Calculate the Bellman equation in (a) under  $P_1^{1*}, P_2^{1*}$ . Update the expected continuation value to  $EV_R^2(Z)$ .
- c. Repeat (b) until an iteration  $n$  such that  $\|P^{n*} - P^{n-1*}\| \approx 0$ .
- d. Set  $P_1^* = P_1^{n*}, P_2^* = P_2^{n*}$ .

#### *Appendix 4.1.3: Subroutine Retailer Best Response*

The objective of this subroutine is to find the responses of the retailer to manufacturer's actions, namely  $\partial P / \partial W$ . In order to do that, we will repeat the subroutine in the Appendix 4.1.2 under the following set of actions of Coke and Pepsi:

$$(W_1 + h, W_2), (W_1, W_2 + h), (W_1 - h, W_2), (W_1, W_2 - h)$$

Then, with a small  $h > 0$ , we can get the related derivatives numerically as follows:

$$\frac{\partial P_j}{\partial W_k} = \lim_{h \rightarrow 0} \frac{P_j^*(W_k + h, W_{-k}) - P_j^*(W_k - h, W_{-k})}{2h}, j, k = 1, 2$$

#### *Appendix 4.1.4: Subroutine Coke's Optimality*

The objective of this subroutine is to get the optimal response of Coke  $W_1^*$  to Pepsi's action  $W_2$  under the retailer's response  $\partial P / \partial W$  and the given expected continuation value of Coke  $EV_1(Z)$ . Here is the subroutine:

1. Start with  $W_1^0$ . Calculate the following Bellman equation

$$V_1(Z) = (W_1 - mc_1)MS_1 + \rho EV_1(Z' | Z, P)$$

where  $mc_1$  is the marginal cost of Coke. If we take the derivative of the above Bellman equation

with respect to  $W_1^0$ , we get the following:

$$\frac{\partial V_1(Z)}{\partial W_1} = MS_1 + MR_1 \frac{\partial MS_1}{\partial W_1} + \rho \frac{\partial EV_1(Z'|Z, P)}{\partial W_1}$$

where

$$\begin{aligned} MR_1 &= (W_1 - mc_1) \\ \frac{\partial MS_1}{\partial W_1} &= \frac{\partial MS_1}{\partial P_1} \frac{\partial P_1}{\partial W_1} + \frac{\partial MS_1}{\partial P_2} \frac{\partial P_2}{\partial W_1} \\ \frac{\partial EV_1(Z'|Z, P)}{\partial W_1} &= \frac{\partial EV_1(Z'|Z, P)}{\partial S'} \frac{\partial S'}{\partial P_1} \frac{\partial P_1}{\partial W_1} + \frac{\partial EV_1(Z'|Z, P)}{\partial S'} \frac{\partial S'}{\partial P_2} \frac{\partial P_2}{\partial W_1} \end{aligned}$$

Then,  $W_1^*$  becomes

$$W_1^* = mc_1 - \left[ MS_1 + \rho \frac{\partial EV_1(Z'|Z, P)}{\partial W_1} \right] \left[ \frac{\partial MS_1}{\partial W_1} \right]^{-1}$$

Then, set  $W_1^1 = W_1^*$ .

2. Repeat (1) with  $W_1^1$ , and from the optimality condition above get  $W_1^2$ .
3. Repeat (2) until an iteration  $n$  such that  $\|W_1^n - W_1^{n-1}\| \approx 0$ .
4. Set  $W_1^* = W_1^n$ .

#### *Appendix 4.1.5: Subroutine Dynamic Coke Response*

The objective of this subroutine is to find the dynamic best response of Coke  $W_1$  to Pepsi's action  $W_2$  under the retailer's best response  $\partial P / \partial W$ . Here is the subroutine:

1. Start with  $EV_1(Z) = 0$ , i.e., the continuation value in Coke's Bellman equation is zero.
  - a. Get  $W_1^{0*}$  under  $EV_1(Z) = 0$ , by using the subroutine in the Appendix 4.1.4. Calculate Coke's Bellman equation under  $W_1^{0*}$ , then interpolate the expected continuation value  $EV_1^1(Z)$ .

- b. Given  $EV_1^1(Z)$ , get  $W_1^{1*}$  by using the subroutine in the Appendix 4.1.4. Calculate Coke's Bellman equation under  $W_1^{1*}$ . Update the expected continuation value via interpolation  $EV_1^2(Z)$ .
- c. Repeat (b) until an iteration  $n$  such that  $\|W_1^{n*} - W_1^{n-1*}\| \approx 0$ .
- d. Set  $W_1^* = W_1^{n*}$ .

*Appendix 4.1.6: Subroutine Pepsi's Optimality*

The objective of this subroutine is to get the optimal response of Pepsi  $W_2$  to Coke's action  $W_1$  under the retailer's response  $\partial P / \partial W$  and given expected continuation value of Pepsi  $EV_2(Z)$ . The way this subroutine works is very similar to the subroutine in the Appendix 4.1.4. Here is the subroutine:

1. Start with  $W_2^0$ . Calculate the following Bellman equation

$$V_2(Z) = (W_2 - mc_2)MS_2 + \rho EV_2(Z' | Z, P)$$

where  $mc_2$  is the marginal cost of Pepsi. Similar to the subroutine in the Appendix 4.1.4, we take the derivative of the above Bellman equation with respect to Pepsi's action. Then, we set  $W_2^1$  to the optimal policy coming from the first-order condition.

2. Repeat (1) with  $W_2^1$ , and from the optimality of Pepsi, get  $W_2^2$ .
3. Repeat (2) until an iteration  $n$  such that  $\|W_2^n - W_2^{n-1}\| \approx 0$ .
4. Set  $W_2^* = W_2^n$ .

*Appendix 4.1.7: Subroutine Dynamic Pepsi Response*

The objective of this subroutine is to find the dynamic best response of Pepsi  $W_2$  to Coke's action  $W_1$  under the retailer's best response  $\partial P / \partial W$ . Here is the subroutine:

1. Start with  $EV_2(Z) = 0$ : the continuation value in Pepsi's Bellman equation is zero.

- a. Get  $W_2^{0*}$  under  $EV_2(Z) = 0$  for the entire state space chosen  $Z$  by using the subroutine in the Appendix 4.1.6. Given  $W_2^{0*}$  calculate the Bellman equation of Pepsi, and interpolate the calculated expected continuation value  $EV_2^1(Z)$ .
- b. Given  $EV_2^1(Z)$ , get  $W_2^{1*}$  for the entire state space chosen  $Z$  by using the subroutine in the Appendix 4.1.6. Calculate the Bellman equation of Pepsi under  $W_2^{1*}$ , and interpolate the expected continuation value  $EV_2^2(Z)$ .
- c. Repeat (b) until an iteration  $n$  such that  $\|W_2^{n*} - W_2^{n-1*}\| \approx 0$
- d. Set  $W_2^* = W_2^{n*}$ .
